# Supplementary material for: Sixteen novel lineages of SARS-CoV-2 in South Africa
Source: Springer Nature journal article supplement (doi:10.1038/s41591-021-01255-3), 2021-02-02
Supplement: 41591_2021_1255_MOESM1_ESM.pdf [file 41591_2021_1255_MOESM1_ESM.pdf]

---

**Supplementary information**

---

**Sixteen novel lineages of SARS-CoV-2 in South Africa**

---

In the format provided by the authors and unedited

Supplemental Table 1: Risk adjusted lockdown levels as imposed by the government of South Africa. Restrictions in various lockdown levels is aimed at reducing the economic burden of lockdown while trying to curb transmission and reduce the strain on the healthcare system.

| Lockdown level | Basic description                                                                                                                                                                                                                                                                                                                                                                                                                                                                                                                                                                                                                                                                                                                                                                                                                                                                                                                                                                                                                                                                                                                                                                                                                                                                                                                                                                                                                               |
|----------------|-------------------------------------------------------------------------------------------------------------------------------------------------------------------------------------------------------------------------------------------------------------------------------------------------------------------------------------------------------------------------------------------------------------------------------------------------------------------------------------------------------------------------------------------------------------------------------------------------------------------------------------------------------------------------------------------------------------------------------------------------------------------------------------------------------------------------------------------------------------------------------------------------------------------------------------------------------------------------------------------------------------------------------------------------------------------------------------------------------------------------------------------------------------------------------------------------------------------------------------------------------------------------------------------------------------------------------------------------------------------------------------------------------------------------------------------------|
| 5              | <ul style="list-style-type: none"> <li>• Only essential services permitted to operate, including supermarkets, banks, postal and IT sectors.</li> <li>• Retail restricted to only essential products (no clothing, liquor or cigarette sales permitted).</li> <li>• Public transport allowed to operate at reduced times (6AM-9PM) and capacity (30%) while adhering to stringent hygiene measures.</li> <li>• Ban on international travel, with the exception for returning nationals and repatriation (subject to 14 day quarantine).</li> <li>• Ban on inter-provincial travel with the exception of transporting essential products, to perform an essential service or in highly exceptional circumstances (funerals).</li> <li>• All public gatherings suspended including all cultural, religious and sporting events.</li> <li>• Funerals allowed but may not exceed 50 people and stringent hygiene measures must be adhered too at all time.</li> <li>• All people to remain in their homes. May only leave to buy essential products and to perform an essential service. Curfew between 8PM and 5AM, with the exception of essential service personal with a permit.</li> <li>• Moratorium on evictions.</li> </ul>                                                                                                                                                                                                                 |
| 4              | <ul style="list-style-type: none"> <li>• Gradual reopening of the economy, maintaining social distancing and hygiene protocols.</li> <li>• All essential services to operate at full capacity.</li> <li>• Retail outlets may sell full range of products from their existing stock, with the exception of liquor and cigarettes.</li> <li>• All postal, IT, media and telecommunication services allowed to operate at 100% capacity.</li> <li>• All financial services allowed to operate at 100% capacity.</li> <li>• All waste and recycling services to resume.</li> <li>• All agriculture and forestry services allowed to operate at 100% capacity, including for export.</li> <li>• All open pit mining allowed to resume full operation, while underground mining allowed to resume at 50% capacity.</li> <li>• Public transport allowed to operate at all times but at reduced capacity (30%), while adhering to stringent hygiene measures.</li> <li>• Ban on international travel, with the exception for returning nationals and repatriation (subject to 14 day quarantine).</li> <li>• Ban on inter-provincial travel with the exception of transporting products, to perform an essential service or in highly exceptional circumstances (funerals).</li> <li>• All public gatherings banned, except for funerals.</li> <li>• Funerals may not exceed 50 people and hygiene measures must be adhered too at all time.</li> </ul> |

|                                                                         |                                                                                                                                                                                                                                                                                                                                                                                                                                                                                                                                                                                                                                                                                                                                                                                                                                                                                                                                                                                                                                                                                                                                                                                                                                                                                                                                                                                                                                                                                     |
|-------------------------------------------------------------------------|-------------------------------------------------------------------------------------------------------------------------------------------------------------------------------------------------------------------------------------------------------------------------------------------------------------------------------------------------------------------------------------------------------------------------------------------------------------------------------------------------------------------------------------------------------------------------------------------------------------------------------------------------------------------------------------------------------------------------------------------------------------------------------------------------------------------------------------------------------------------------------------------------------------------------------------------------------------------------------------------------------------------------------------------------------------------------------------------------------------------------------------------------------------------------------------------------------------------------------------------------------------------------------------------------------------------------------------------------------------------------------------------------------------------------------------------------------------------------------------|
| <p style="text-align: center; font-size: 2em; font-weight: bold;">3</p> | <ul style="list-style-type: none"> <li>• Further opening of the economy, while maintaining social distancing and hygiene protocols.</li> <li>• Take away restaurants and online food deliveries allowed.</li> <li>• Liquor retail allowed to resume within restricted hours (Monday - Thursday). No on-sight distribution of liquor allowed (i.e. bars and restaurants may not sell liquor). Prohibition on the sale of cigarettes remains in place.</li> <li>• Clothing retailers and manufactures may operate at 50% capacity.</li> <li>• Licensing, permit offices and other governments services allowed to resume.</li> <li>• Stationery, personal and office electronics, books and other educational products allowed to be sold.</li> <li>• E-commerce and delivery services allowed to resume at 100% capacity.</li> <li>• National road and rail works to resume.</li> <li>• Automotive, chemicals, bottling, cement, steel and machinery manufacturing to resume at 100% capacity.</li> <li>• Public transport allowed to operate at all times but at reduced capacity (50%), while adhering to stringent hygiene measures.</li> <li>• Ban on international travel remains in place, with the exception of returning nationals.</li> <li>• Domestic air travel permitted for work and trade purposes only.</li> <li>• All public gatherings restricted to funerals, professional non-contact sports and auctions (must adhere to stringent hygiene measures).</li> </ul> |
| <p style="text-align: center; font-size: 2em; font-weight: bold;">2</p> | <ul style="list-style-type: none"> <li>• Further easing of restrictions, while maintaining social distancing and hygiene protocols.</li> <li>• Curfew remains in place between 10PM and 4AM.</li> <li>• All retail allowed including cigarettes and liquor (at reduced trading hours).</li> <li>• On-site consumption of liquor (e.g. bars) allowed until 10PM.</li> <li>• All construction to resume at 100% capacity.</li> <li>• All other manufacturing, government services and mining not permitted under level 3 may resume at 100% capacity.</li> <li>• All domestic workers, gardening, maintenance and repair services allowed to resume.</li> <li>• International travel is still prohibited with the exception of returning nationals.</li> <li>• All forms of inter-provincial travel allowed, including for leisure and tourism purposes. Domestic air travel and car rental services restored (must adhere to hygiene measures).</li> <li>• Restrictions on family and social visits lifted, but caution is urged.</li> <li>• Gyms and fitness centres allowed to reopen with social distancing and hygiene measures in place. Contact professional sport allowed to resume, but with no spectators.</li> </ul>                                                                                                                                                                                                                                                       |
| <p style="text-align: center; font-size: 2em; font-weight: bold;">1</p> | <ul style="list-style-type: none"> <li>• Further lifting of restrictions, while social distancing and hygiene measures remain in place.</li> <li>• Public gatherings limited to 250 people for indoor events and 500 people for outdoor events.</li> <li>• Funerals with a maximum of 100 people allowed.</li> <li>• Physical exercise, recreational and entertainment venues allowed to operate at 50% capacity.</li> <li>• Restriction on spectator sporting events remains in place.</li> </ul>                                                                                                                                                                                                                                                                                                                                                                                                                                                                                                                                                                                                                                                                                                                                                                                                                                                                                                                                                                                  |

|  |                                                                                                                                                                                                                                                                                                                                                                                                                    |
|--|--------------------------------------------------------------------------------------------------------------------------------------------------------------------------------------------------------------------------------------------------------------------------------------------------------------------------------------------------------------------------------------------------------------------|
|  | <ul style="list-style-type: none"><li>• International travel gradually reinstated from 1 October 2020. Travelers to South Africa must have proof of a COVID-19 negative test result 72 hours prior to their arrival. Mandatory quarantine for travellers with no test results.</li><li>• Curfew remains in place between midnight and 4AM.</li><li>• Liquor sales permitted between Mondays and Fridays.</li></ul> |
|--|--------------------------------------------------------------------------------------------------------------------------------------------------------------------------------------------------------------------------------------------------------------------------------------------------------------------------------------------------------------------------------------------------------------------|
